# Supplementary material
Source: HighWire-hosted journal article supplement (https://ez-admanager.com/highwire/filestream/135930/field_highwire_adjunct_files/0/etminan_881.pdf)
Supplement: etminan_881.pdf [file etminan_881.pdf]

# Escala para el tratamiento del aneurisma intracraneal no roto

Un consenso multidisciplinario

Nima Etminan, MD  
Robert D. Brown, Jr., MD  
Kerim Beseoglu, MD  
Seppo Juvela, MD, PhD  
Jean Raymond, MD  
Akio Morita, MD, PhD  
James C. Torner, MSc,  
PhD  
Colin P. Derdeyn, MD  
Andreas Raabe, MD  
J. Mocco, MD  
Miikka Korja, MD, PhD  
Amr Abdulazim, MD  
Sepideh Amin-Hanjani,  
MD  
Rustam Al-Shahi Salman,  
FRCP Edin, PhD  
Daniel L. Barrow, MD  
Joshua Bederson, MD  
Alain Bonafe, MD  
Aaron S. Dumont, MD  
David J. Fiorella, MD,  
PhD  
Andreas Gruber, MD  
Graeme J. Hankey, MD  
David M. Hasan, MD  
Brian L. Hoh, MD  
Pascal Jabbour, MD  
Hidetoshi Kasuya, MD  
Michael E. Kelly, MD  
Peter J. Kirkpatrick, MD  
Neville Knuckey, MD  
Timo Koivisto, MD, PhD  
Timo Krings, MD, PhD  
Michael T. Lawton, MD  
Thomas R. Marotta, MD  
Stephan A. Mayer, MD  
Edward Mee, MD  
Vitor Mendes Pereira,  
MD, MSc  
Andrew Molyneux, MD  
Michael K. Morgan, MD  
Kentaro Mori, MD, PhD  
Yuichi Murayama, MD  
Shinji Nagahiro, MD

## RESUMEN

**Objetivo:** Nos esforzamos en desarrollar un modelo de escala para el tratamiento del aneurisma intracraneal no roto (UIATS, *unruptured intracranial aneurysm treatment score*) que incluya y cuantifique los factores clave involucrados en la toma de decisión clínica en el manejo de los aneurismas intracraneales no rotos (UIA, *unruptured intracranial aneurysm*) y evaluar el acuerdo para este modelo entre los especialistas en el manejo y la investigación de UIA.

**Métodos:** Un grupo internacional multidisciplinario (neurocirugía, neurorradiología, neurología, epidemiología clínica) de 69 especialistas fue convocado para desarrollar y validar el modelo UIATS utilizando el consenso Delphi. Para validación interna (39 miembros de paneles involucrados en la identificación de características relevantes) y externa (30 revisores externos independientes), se utilizaron 30 casos seleccionados de UIA para analizar el acuerdo con las recomendaciones del manejo UIATS en base a la escala Likert de 5 puntos (el 5 indica fuerte acuerdo). El acuerdo intertasador (CIT) fue evaluado con coeficientes de dispersión estandarizados ( $v_r^*$ ) ( $v_r^* = 0$  indica excelente acuerdo y  $v_r^* = 1$  indica pobre acuerdo).

**Resultados:** El UIATS cuenta con 29 factores clave en el manejo del UIA. El acuerdo con UIATS (Puntajes Likert promedio) fue 4,2 (intervalo de confianza [IC] del 95% 4,1–4,3) por revisor para ambas cohortes de revisión; el acuerdo por caso fue 4,3 (IC 95% 4,1–4,4) para miembros del panel y 4,5 (IC 95% 4,3–4,6) para revisores externos ( $p = 0,017$ ). Los puntajes de Likert promedio fueron 4,2 (IC 95% 4,1–4,3) para revisores intervencionistas ( $n = 56$ ) y 4,1 (IC 95% 3,9–4,4) para revisores no intervencionistas ( $n = 12$ ) ( $p = 0,290$ ). CIT global ( $v_r^*$ ) para ambas cohortes fue 0,026 (IC 95% 0,019–0,033).

**Conclusiones:** Este novedoso estudio para una guía de decisión en UIA captura un excelente consenso entre individuos altamente informados en el manejo de UIA, independientemente de su especialidad subyacente. Los clínicos pueden usar el UIATS como un mecanismo exhaustivo para indicar cómo un gran grupo de especialistas podrían manejar un paciente individual con un UIA. *Neurology*® 2015;85:881–889

## GLOSARIO

**HSA** = hemorragia subaracnoidea; **IC** = intervalo de confianza; **UIA** = aneurisma intracraneal no roto (*unruptured intracranial aneurysm*); **UIATS** = escala para el tratamiento del aneurisma intracraneal no roto (*unruptured intracranial aneurysm treatment score*).

Los aneurismas intracraneales no rotos (UIA) son prevalentes en 3% de la población adulta y son cada vez más detectados debido al uso más frecuente de neuroimágenes craneales.<sup>1,2</sup> Estudios de cohorte previos encontraron que sólo una pequeña proporción de los UIA se rompen, y provocan hemorragia subaracnoidea (HSA) con una tasa de fatalidad por caso significativa.<sup>3–9</sup> Aunque parcialmente sesgado por la selección de subgrupos específicos de UIA, estos estudios encontraron que especialmente los UIA pequeños tienen generalmente bajo riesgo de ruptura. Sin embargo, debido a que los pequeños UIA son altamente prevalentes, la mayoría de los casos de HSA están causados por la ruptura de pequeños aneurismas, pero no está claro cuáles de los UIA pequeños van a romperse, para que el tratamiento preventivo sea considerado. Estudios de casos y controles han sugerido factores (ej., morfología del UIA, historia familiar, tabaquismo o hipertensión) que pueden aumentar el riesgo de ruptura de UIA, pero sigue habiendo pocas certezas.<sup>10–13</sup> Esto es más complicado por el hecho de que hay sólo unos pocos factores de riesgo establecidos para complicaciones durante la reparación del aneurisma (ej., edad del paciente), incluso a pesar de que numerosos factores han sido sugeridos.<sup>14,15</sup>

Las afiliaciones de los autores se encuentran al final del artículo.

Ir a [Neurology.org](http://Neurology.org) para declaraciones de intereses completas. La información sobre fondos y aquellas declaraciones relevantes para los autores, si existiesen, se encuentran al final del artículo.

El Article Processing Charge fue pagado por el Department of Neurosurgery, Medical Faculty, Heinrich-Heine University, Düsseldorf, Germany.

Este es un artículo de acceso abierto distribuido bajo los términos del Creative Commons Attribution-Non Commercial-No Derivatives License 4.0 (CC BY-NC-ND), que permite descargar y compartir el trabajo, siempre y cuando esté apropiadamente citado. El trabajo no puede ser cambiado de ninguna forma o utilizado comercialmente.

La lista de autores continúa en la próxima página.

Naoki Nakayama, MD,  
DMSc  
Mika Niemelä, MD, PhD  
Christopher S. Ogilvy,  
MD  
Laurent Pierot, MD  
Alejandro A. Rabinstein,  
MD  
Yvo B.W.E.M. Roos, MD  
Jaakko Rinne, MD, PhD  
Robert H. Rosenwasser,  
MD  
Antti Ronkainen, MD,  
PhD  
Karl Schaller, MD  
Volker Seifert, MD  
Robert A. Solomon, MD  
Julian Spears, MD  
Hans-Jakob Steiger, MD  
Mervyn D.I. Vergouwen,  
MD, PhD  
Isabel Wanke, MD  
Marieke J.H. Wermer,  
MD  
George K.C. Wong, MD  
John H. Wong, MD, MSc  
Gregory J. Zipfel, MD  
E. Sander Connolly, Jr.,  
MD  
Helmuth Steinmetz, MD  
Giuseppe Lanzino, MD  
Alberto Pasqualin, MD  
Daniel Rufenacht, MD  
Peter Vajkoczy, MD  
Cameron McDougall, MD  
Daniel Hänggi, MD  
Peter LeRoux, MD  
Gabriel J.E. Rinkel, MD  
R. Loch Macdonald, MD,  
PhD

Dirección para correspondencia al  
Dr. Etminan:  
etminan@uni-duesseldorf.de

Por lo tanto, los datos con niveles de evidencia variables deben ser tenidos en cuenta al aconsejar a los pacientes con UIA, que puede llevar a altos niveles de variación en el manejo del UIA entre médicos.<sup>16,17</sup> Nuestro objetivo fue (1) desarrollar una escala de tratamiento (UIATS) que resuma y cuantifique explícitamente los datos de los consensos recientemente reportados en los factores que los especialistas en UIA consideran para el manejo apropiado de los UIA, y (2) evaluar el grado de acuerdo con las recomendaciones sobre el manejo en base a la UIATS entre especialistas que estuvieron y no estuvieron involucrados en su desarrollo.<sup>18</sup>

**MÉTODOS Consenso Delphi.** Un grupo multidisciplinario de 69 especialistas cerebrovasculares, que consistía de 43 neurocirujanos (11 de los cuales fueron entrenados tanto en reparación aneurismática neuroquirúrgica como endovascular), 14 neurorradiólogos intervencionistas, 11 neurólogos y 1 epidemiólogo, fue convocado para participar en el consenso Delphi en el manejo contemporáneo del UIA (figura 1 y figura e-1 en el sitio web de *Neurology*<sup>®</sup> en [Neurology.org](http://Neurology.org)). Los datos de las primeras 4 rondas del proceso del consenso Delphi de 7 pasos derivó de un cuestionario de la web (Survey Monkey, Palo Alto, CA) e identificó y ranqueó las características más relevantes utilizadas para evaluar y manejar UIA.<sup>18</sup> Estos datos fueron utilizados para desarrollar y luego validar el modelo UIATS en las rondas 5-7. El grupo del consenso consistió de 2 cohortes: 39 de los 69 especialistas (miembros del panel) participaron en las primeras 6 rondas para desarrollar y validar el modelo de la escala, mientras que los restantes 30 especialistas (revisores externos) que no participaron en el desarrollo del modelo de puntajes, revisaron los casos y las recomendaciones de manejo derivadas del UIATS para su validación externa. Las características de los 39 miembros del panel han sido previamente reportadas.<sup>18</sup> Los 30 revisores externos consistieron en 16 neurocirujanos (7 de los cuales tenían doble entrenamiento en reparación endovascular y quirúrgica de aneurismas), 7 neurorradiólogos intervencionistas y 7 neurólogos. Dos autores (N.E. y K.B.) que no participaron en el proceso Delphi diseñaron las rondas del cuestionario, compilaron los casos representativos y desarrollaron la UIATS con la opinión de miembros seleccionados del panel. Las definiciones (ver abajo) y categorías preferidas (ej., para el tamaño del aneurisma y el rango de edad del paciente) para estimar la relevancia para el riesgo de ruptura de UIA o tratamiento fueron determinadas en base a la frecuencias medias de acuerdo para los resultados en las rondas 2, 3 y 6. Una frecuencia de participación del 70% fue considerada suficiente para completar una ronda o para aceptar una definición o categoría.

El desarrollo y validación del modelo UIATS están descritos en la sección e-Métodos (tablas e-1 y e-2).

**Definiciones.** El modelo UIATS no se aplica para cualquier aneurisma no sacular como el infeccioso, traumático, fusiforme o disecante; los aneurismas relacionados al flujo asociados con malformaciones arteriovenosas; los raros aneurismas saculares asociados con enfermedades/entidades específicas (ej., enfermedades del colágeno, dwarfismo, síndrome moyamoya); y aneurismas en pacientes menores a 18 años, ya que estos aneurismas son raros, pueden tener una historia natural distinta, y pueden alterar significativamente la complejidad de la escala. Las siguientes definiciones para ítems individuales están presentadas en orden de aparición en el modelo UIATS.

**Domínio del paciente.** Los aneurismas familiares fueron considerados como tales en familias en las cuales 2 o más familiares de primer grado tenían diagnóstico de UIA o HSA previa.<sup>19</sup> El tabaquismo activo fue definido como un factor de riesgo para adultos que habían fumado 100 cigarrillos en su vida y fumado cigarrillos todos los días (diariamente) o algunos días (no diariamente) al momento de la presentación clínica.<sup>20</sup> La hipertensión, tratada o no tratada, fue definida como una presión arterial sistólica de más de 140 mm Hg y/o presión

arterial diastólica mayor a 90 mm Hg.<sup>21</sup> El uso actual de drogas o alcohol fue definido como un factor de riesgo en aquellos con una exposición reciente (a 1 año de la presentación clínica) a cocaína o anfetaminas o consumo importante de alcohol (> 300 g de etanol semanal). Los signos clínicos o radiológicos de efecto de masa fueron definidos como cualquier síntoma o hallazgos indicativos de un efecto ocupante de espacio global o focal de un UIA, como cefaleas progresivas sin HSA, náuseas, vómitos, hallazgos neurológicos o radiológicos focales (desviación de la línea media y/o herniación, edema y compresión de nervio craneal). Los déficit de nervios craneales estuvieron definidos como cualquier déficit neurológico por la compresión de un nervio craneal, ej., alteraciones visuales, disfunción oculomotora por UIA de la circulación anterior y/o déficits de nervios craneales bajos (IX, X u XI) por UIA de la circulación posterior. Las enfermedades crónicas o malignas fueron definidas como cualquier trastorno cardiovascular, pulmonar, renal, gastrointestinal, musculoesquelético o del SNC, de etiología no maligna o maligna, que altere la expectativa de vida del paciente. Los trastornos neurocognitivos fueron definidos por la enfermedad de Alzheimer u otras etiologías de demencia que resultan en un impedimento de la habilidad del paciente para vivir solo. Las coagulopatías concomitantes fueron definidas por la hemofilia y la enfermedad de von Willebrand. Las trombofilias concomitantes fueron definidas por la mutación del factor V de Leiden, el síndrome antifosfolípido, la deficiencia de antitrombina III o deficiencia de proteína C/S. Los trastornos psiquiátricos fueron definidos por la depresión clínica, el trastorno afectivo bipolar, el trastorno esquizoafectivo o el trastorno obsesivo-compulsivo, resultando en un impedimento del paciente en su habilidad para vivir solo.

**Domínio del aneurisma.** El tamaño del aneurisma fue definido como el mayor diámetro del aneurisma, medido utilizando la reconstrucción tridimensional de las angiografías por cateterismo. La lobulación del aneurisma fue definida como un segundo saco irregular en forma de protrusión/es de la pared del aneurisma en las imágenes de reconstrucción tridimensional de la angiografía. La razón del aspecto fue definida como la razón de la dimensión del cuerpo del aneurisma y el ancho del cuello.<sup>13</sup> La razón del tamaño fue definida como el diámetro mayor del aneurisma dividido por el diámetro de la arteria madre.<sup>22</sup>

**Domínio del tratamiento.** Además de todas las mediciones listadas bajo el tratamiento conservador, el tratamiento (reparación del aneurisma) fue definido como cualquier tipo de reparación quirúrgica o endovascular del UIA. El manejo conservador fue definido como el seguimiento clínico y/o radiológico y cualquier tratamiento médico (ej., para hipertensión o epilepsia) o modificación de factores de riesgo del estilo de vida (ej., cesación tabáquica, cesación del consumo de alcohol o drogas). En caso de normalización efectiva de la hipertensión o cesación efectiva de los factores de riesgo del estilo de vida por al menos 1 año de seguimiento, tales factores de riesgo no necesitan más ser considerados en una evaluación subsecuente utilizando la UIATS. Un aneurisma complejo fue definido como un aneurisma de cualquier tamaño que también tiene alguna de las siguientes características: cuello ancho (mayor al diámetro de la arteria madre), lobulaciones significativas, calcificaciones, trombos intra-aneurismáticos, tortuosidad/estenosis del vaso proximal, rama de arteria incorporada al cuello o saco del aneurisma, y aneurismas de diámetro muy pequeño (< 3 mm).

**Análisis estadístico.** Cuando fuese relevante, la significancia era aceptada a un nivel de  $p < 0,05$ . Un test de Wilcoxon *signed-rank* para muestras relacionadas fue utilizado para comparar el acuerdo en la ronda 5 con el acuerdo en la ronda 6 para identificar cambios relevantes en el acuerdo siguiendo en ajuste de la UIATS luego de la ronda 5. Las diferencias significativas en el acuerdo con el UIATS entre miembros del panel y revisores externos por caso, por revisor y por especialidad (intervencionista [neurocirugía, neurorradiología intervencionista o ambas] vs no intervencionista [neurología o epidemiología clínica]) fueron luego identificadas utilizando el test Mann-Whitney *U* basado en los puntajes medios de Likert. Las medias e intervalos de confianza (IC) del 95% fueron elegidos en vez de las medianas para ilustrar la variabilidad en el acuerdo por caso, por revisor y por especialidad. Los coeficientes de dispersión de cuartiles estandarizados ( $v_i^*$ ) fueron calculados para determinar el grado de acuerdo intertasador para cada caso.<sup>18</sup>

**Figura 1 Flujo del estudio en el proceso del consenso Delphi**

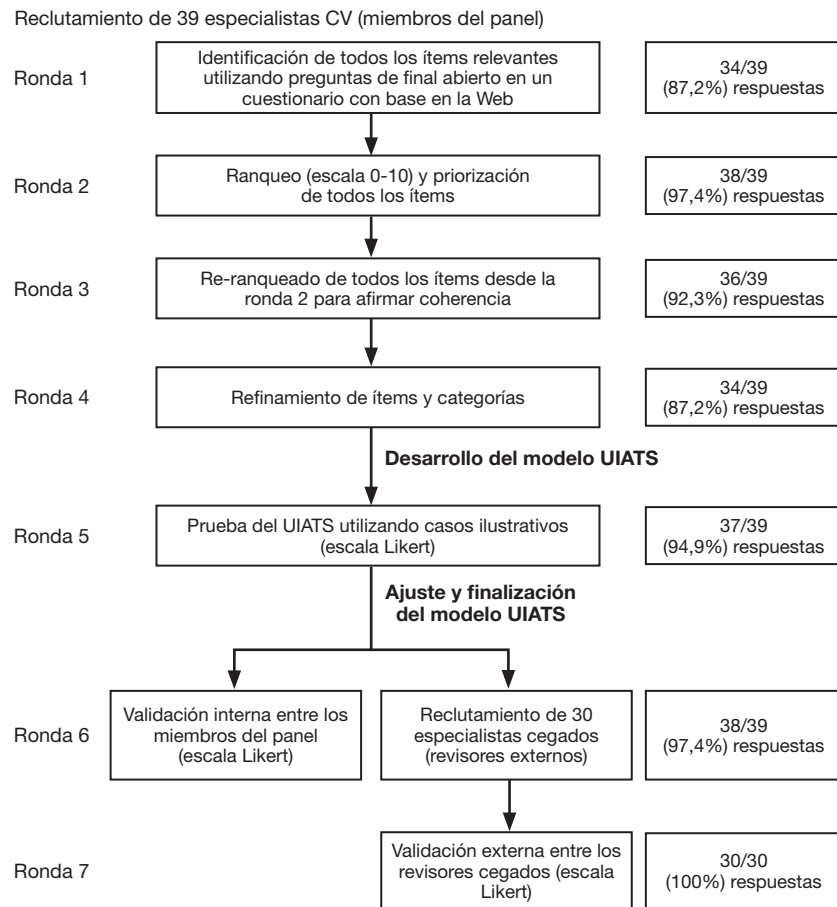

Las frecuencias de los participantes para cada ronda son dados entre paréntesis. El grupo de los miembros del panel consistió de 28 neurocirujanos (5 de los cuales habían sido doblemente entrenados en el tratamiento neuroquirúrgico y endovascular para la reparación de aneurismas), 7 neurorradiólogos intervencionistas, 3 neurólogos y 1 epidemiólogo clínico. El grupo de revisores externos consistió de 15 neurocirujanos (7 de los cuales habían sido doblemente entrenados en el tratamiento neuroquirúrgico y endovascular para la reparación de aneurismas), 7 neurorradiólogos intervencionistas y 8 neurólogos. CV = cerebrovascular; UIATS = escala para el tratamiento del aneurisma intracraneal no roto (*unruptured intracranial aneurysm treatment score*).

Los valores  $v_r^*$  que se acercan a 0 corresponden a un alto grado de acuerdo intertasador, mientras que los valores de  $v_r^*$  cerca de 1 corresponden a un bajo grado de acuerdo intertasador. El coeficiente de la correlación del momento del producto Pearson fue calculado para analizar la asociación potencial entre el nivel de acuerdo entre los miembros del panel o revisores externos y la magnitud del puntaje. La magnitud del puntaje, definida como la diferencia absoluta entre los valores numéricos de UIATS apoyando la “reparación del aneurisma” y el “manejo conservador” para cada caso (un puntaje de poca magnitud sugiere una recomendación UIATS menos definitiva), fue utilizada para analizar la relación de la fuerza de la recomendación derivada de UIATS y el nivel de acuerdo entre los revisores.

**RESULTADOS** El flujo del estudio y las frecuencias de los participantes durante el proceso del consenso Delphi son dados en la figura 1. El modelo UIATS fue desarrollado en base a los datos de las rondas 1-4 en 3 dominios (relacionado al paciente, al aneurisma y al tratamiento), comprendiendo 13 categorías diferentes y 29 características diferentes (figura 2).

La aplicabilidad del modelo preliminar de UIATS fue inicialmente probado en la ronda 5. El acuerdo medio con las recomendaciones derivadas de UIATS basado en los puntajes Likert (5 indicando fuerte acuerdo y 1 indicando fuerte desacuerdo) fue 3,7

(IC 95% 3,6-3,8) por miembro del panel y 3,7 (IC 95% 3,3-4,1) por caso. Luego del ajuste de UIATS para edad y tamaño del aneurisma, el acuerdo medio con las recomendaciones de tratamiento en base al modelo final de UIATS por revisor fue 4,2 (IC 95% 4,1-4,3) para los miembros del panel ( $p < 0,001$  en comparación con ronda 5) y 4,2 (IC 95% 4,1-4,3) para los revisores externos. El acuerdo medio por caso fue 4,3 (IC 95% 4,1-4,4) para los miembros del panel ( $p < 0,01$  en comparación con ronda 5) y 4,5 (IC 95% 4,3-4,6) para revisores externos (figura 3A). El acuerdo por caso fue mayor entre los revisores externos que entre los miembros del panel ( $p = 0,017$ , test Mann-Whitney  $U$ ). El acuerdo global dicotomizado (acuerdo *vs* desacuerdo) con las recomendaciones de tratamiento basadas en UIATS fue 95% entre los miembros del panel y 94% entre los revisores externos. El acuerdo intertasador por caso fue alto para ambas cohortes de revisores ( $v_r^* = 0,023$ ; IC 95% 0,018-0,027 para miembros del panel;  $v_r^* = 0,028$ ; IC 95% 0,022-0,034 para revisores externos). A pesar de una distribución no balanceada de especialidades entre el grupo del consenso, no hubo diferencia ( $p = 0,290$ ; test Mann-Whitney  $U$ ) en los puntajes medios Likert por revisor entre las especialidades in-

El modelo de escala de tratamiento del aneurisma intracraneal no roto (UIATS) incluye y cuantifica los factores clave para la toma de decisión clínica en el manejo de los aneurismas intracraneales no rotos (UIA), desarrollado en base al ranqueo de datos relevantes de las rondas 1-4 del consenso Delphi.<sup>18</sup> Para calcular una recomendación de manejo para un UIA, se van sumando el número de puntos correspondiente a las características de cada paciente, del aneurisma o relacionadas con el tratamiento, en ambas columnas sobre el manejo, en el cuestionario ("a favor de la reparación de UIA" y "a favor del manejo conservador del UIA"). Esto va a llevar a 2 valores numéricos, 1 favoreciendo la reparación del aneurisma (quirúrgica o endovascular) y 1 favoreciendo el manejo conservador. Las definiciones para cada categoría y factor se encuentran en la sección de Métodos. Para casos con una diferencia en el puntaje de 3 puntos o más, la dirección, por ej., la diferencia entre los valores numéricos calculados en cada lado de las columnas de recomendación, va a sugerir una recomendación de manejo individual (ej., reparación del aneurisma o manejo conservador). Para casos que tienen puntajes similares en cuanto al tratamiento del aneurisma y al manejo conservador ( $\pm 2$  puntos de diferencia o menos), la recomendación es "no definitiva" y cualquier enfoque del tratamiento puede ser apoyado, ya que factores adicionales aparte de los utilizados en el desarrollo del UIATS pueden ser considerados para tomar la decisión final en cuanto a la recomendación de manejo y seguimiento a largo plazo. Para casos con múltiples aneurismas, cada aneurisma debe ser evaluado por separado, que luego va a resultar en diferentes recomendaciones para cada aneurisma. \*El riesgo mínimo de intervención es siempre sumado como un factor constante (5 puntos). ABas = arteria basilar; AComA = arteria comunicante anterior; AComP = arteria comunicante posterior; HSA = hemorragia subaracnoidea; PA = presión arterial; múltiple = categoría de selección múltiple; única = categoría de selección única.

Figura 2 Escala para el tratamiento del aneurisma intracraneal no roto

| <b>Paciente</b>                                                                | <b>Edad (única)</b>                                           | < 40 años                                                   | 4                        | <input type="checkbox"/>            |  |
|--------------------------------------------------------------------------------|---------------------------------------------------------------|-------------------------------------------------------------|--------------------------|-------------------------------------|--|
|                                                                                |                                                               | 40-60 años                                                  | 3                        |                                     |  |
|                                                                                |                                                               | 61-70 años                                                  | 2                        |                                     |  |
|                                                                                |                                                               | 71-80 años                                                  | 1                        |                                     |  |
|                                                                                |                                                               | > 80 años                                                   | 0                        |                                     |  |
|                                                                                | <b>Incidencia de factores de riesgo (múltiple)</b>            | HSA previa de un aneurisma diferente                        | 4                        | <input type="checkbox"/>            |  |
|                                                                                |                                                               | Aneurismas intracraneales o HSA familiares                  | 3                        |                                     |  |
|                                                                                |                                                               | Etnia japonesa, finlandesa, inuita                          | 2                        |                                     |  |
|                                                                                |                                                               | Tabaquismo activo                                           | 3                        |                                     |  |
|                                                                                |                                                               | Hipertensión (sistólica > 140 mm Hg)                        | 2                        |                                     |  |
|                                                                                |                                                               | Enfermedad renal poliquística autosómica                    | 2                        |                                     |  |
|                                                                                |                                                               | Abuso activo de drogas (cocaína, anfetaminas)               | 2                        |                                     |  |
|                                                                                |                                                               | Alcoholismo activo                                          | 1                        |                                     |  |
|                                                                                | <b>Síntomas clínicos relacionados con UIA (múltiple)</b>      | Déficits de nervios craneales                               | 4                        | <input type="checkbox"/>            |  |
|                                                                                |                                                               | Efecto de masa clínica o radiológica                        | 4                        |                                     |  |
|                                                                                |                                                               | Eventos tromboembólicos del aneurisma                       | 3                        |                                     |  |
|                                                                                |                                                               | Epilepsia                                                   | 1                        |                                     |  |
|                                                                                | <b>Otros (múltiple)</b>                                       | Calidad de vida reducida debido al temor a la ruptura       | 2                        | <input type="checkbox"/>            |  |
| Múltiples aneurismas                                                           |                                                               | 1                                                           |                          |                                     |  |
| <b>Expectativa de vida debido a enfermedades crónicas y/o malignas (única)</b> | < 5 años                                                      | 4                                                           | <input type="checkbox"/> |                                     |  |
|                                                                                | 5-10 años                                                     | 3                                                           |                          |                                     |  |
|                                                                                | > 10 años                                                     | 1                                                           |                          |                                     |  |
| <b>Enfermedad comórbida (múltiple)</b>                                         | Trastorno neurocognitivo                                      | 3                                                           | <input type="checkbox"/> |                                     |  |
|                                                                                | Coagulopatías, trombofilias                                   | 2                                                           |                          |                                     |  |
|                                                                                | Enfermedad psiquiátrica                                       | 2                                                           |                          |                                     |  |
| <b>Aneurisma</b>                                                               | <b>Diámetro máximo (única)</b>                                | $\leq 3,9$ mm                                               | 0                        | <input type="checkbox"/>            |  |
|                                                                                |                                                               | 4,0-6,9 mm                                                  | 1                        |                                     |  |
|                                                                                |                                                               | 7,0-12,9 mm                                                 | 2                        |                                     |  |
|                                                                                |                                                               | 13,0-24,9 mm                                                | 3                        |                                     |  |
|                                                                                |                                                               | $\geq 25$ mm                                                | 4                        |                                     |  |
|                                                                                | <b>Morfología (múltiple)</b>                                  | Irregularidad o lobulación                                  | 3                        | <input type="checkbox"/>            |  |
|                                                                                |                                                               | Razón del tamaño > 3 o razón de aspecto > 1,6               | 1                        |                                     |  |
|                                                                                | <b>Localización (única)</b>                                   | Bifurcación de la ABas                                      | 5                        | <input type="checkbox"/>            |  |
|                                                                                |                                                               | Arteria vertebral/basilar                                   | 4                        |                                     |  |
|                                                                                |                                                               | AComA o AComP                                               | 2                        |                                     |  |
|                                                                                | <b>Otros (múltiple)</b>                                       | Crecimiento del aneurisma en imágenes seriadas              | 4                        | <input type="checkbox"/>            |  |
|                                                                                |                                                               | Formación de <i>novo</i> del aneurisma en imágenes seriadas | 3                        |                                     |  |
| Enfermedad estenosante/oclusiva de vasos contralaterales                       |                                                               | 1                                                           |                          |                                     |  |
| <b>Tratamiento</b>                                                             | <b>Riesgo relacionado a la edad (única)</b>                   | < 40 años                                                   | 0                        | <input type="checkbox"/>            |  |
|                                                                                |                                                               | 41-60 años                                                  | 1                        |                                     |  |
|                                                                                |                                                               | 61-70 años                                                  | 3                        |                                     |  |
|                                                                                |                                                               | 71-80 años                                                  | 4                        |                                     |  |
|                                                                                |                                                               | > 80 años                                                   | 5                        |                                     |  |
|                                                                                | <b>Riesgo relacionado con el tamaño del aneurisma (única)</b> | < 6,0 mm                                                    | 0                        | <input type="checkbox"/>            |  |
|                                                                                |                                                               | 6,0-10,0 mm                                                 | 1                        |                                     |  |
|                                                                                |                                                               | 10,1-20,0 mm                                                | 3                        |                                     |  |
| > 20 mm                                                                        |                                                               | 5                                                           |                          |                                     |  |
| <b>Riesgo relacionado con la complejidad del aneurisma</b>                     | Alto                                                          | 3                                                           | <input type="checkbox"/> |                                     |  |
|                                                                                | Bajo                                                          | 0                                                           |                          |                                     |  |
| <b>Riesgo relacionado con la intervención</b>                                  | Constante*                                                    |                                                             | <input type="checkbox"/> | <input checked="" type="checkbox"/> |  |

Favorece la reparación de UIA Favorece el manejo conservador del UIA



**Figura 3 Validación del UIATS**

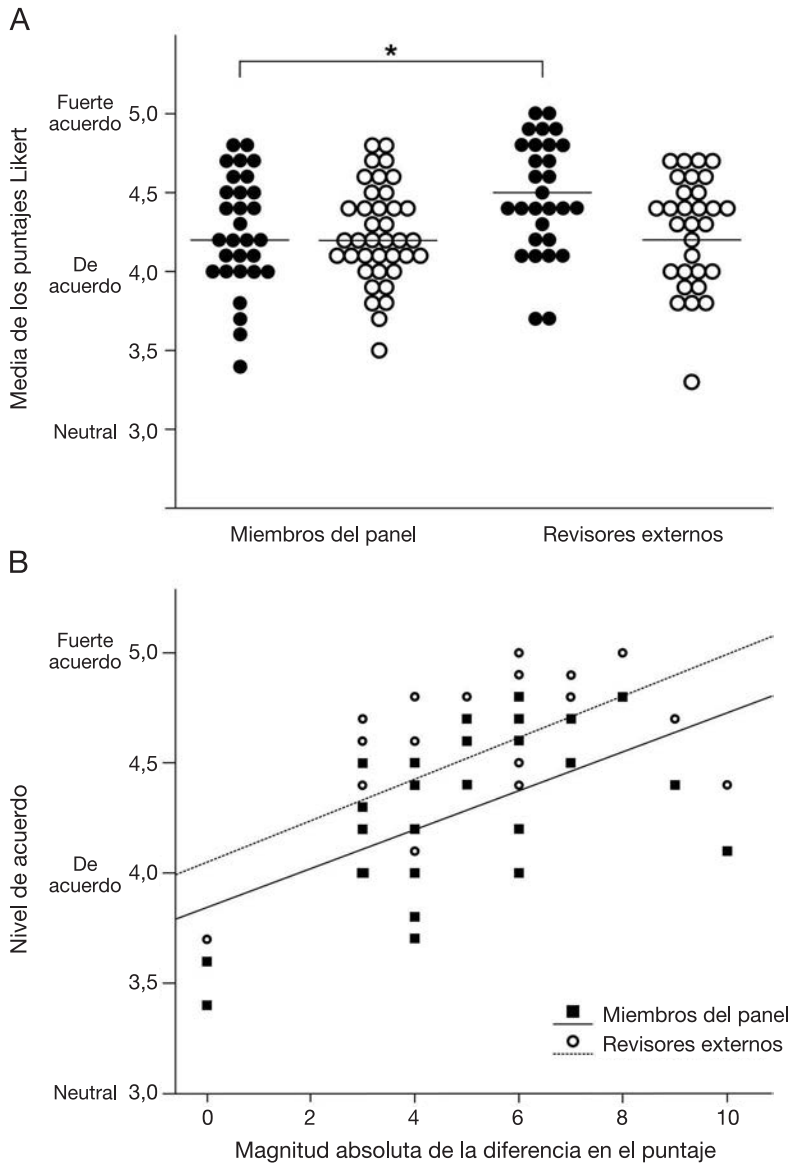

(A) Recomendaciones derivadas del acuerdo con la escala para el tratamiento de aneurismas intracraniales no rotos (UIATS) por caso y por ranqueador. Las medias de los puntajes de Likert (eje y) están ilustradas para cada caso (puntos) y para cada ranqueador (círculos) entre los miembros del panel y los revisores externos cegados (eje x). Un puntaje de Likert de 5 indica un fuerte acuerdo; 4 indica acuerdo; 3 indica neutralidad; 2 indica desacuerdo y 1 indica fuerte desacuerdo. Como las medias del puntaje Likert no caían por debajo de un puntaje de 3, la escala del eje y no muestra desacuerdo o fuerte desacuerdo. En comparación con el acuerdo de los miembros del panel con recomendaciones de tratamiento derivadas del UIATS para cada caso, la media del puntaje Likert (eje y) fue significativamente mayor entre los revisores externos, que estaban completamente cegados a los datos de puntaje crudos y al desarrollo y diseño del cuestionario (\* indica  $p = 0,017$ ). (B) Correlación de puntajes de Likert y las características del UIATS. El nivel de acuerdo (eje y) entre los miembros del panel y los revisores externos fue correlacionado (Momento del producto Pearson) con las diferencias del UIATS entre la reparación del aneurisma y el manejo conservador para cada recomendación de tratamiento del UIATS (eje x). La magnitud del puntaje se correlacionó significativamente con el acuerdo entre los revisores, independientemente para los miembros del panel ( $r^2 = 0,323$ ;  $p = 0,002$ ; línea sólida) y para revisores externos ( $r^2 = 0,399$ ;  $p < 0,001$ ; línea punteada).

tervencionistas (4,2; IC 95% 4,1-4,3 para neurocirugía, neurorradiología intervencionista o ambas,  $n = 56$ ) y no intervencionistas (4,1; IC 95% 3,9-4,4 para neurología y epidemiología clínica,  $n = 12$ ) o entre las especialidades individuales ( $p = 0,325$ ; test Mann-Whitney  $U$ ). Hubo una correlación distintiva entre la magnitud del puntaje de la recomendación (diferencia en puntos para manejo intervencionista y conservador) y el nivel de acuerdo, sugiriendo que cuanto más clara es la recomendación de la UIATS, mayor es el nivel de acuerdo entre los revisores (figu-

ra 3B). Un set representativo de ejemplos UIATS y las recomendaciones UIATS correspondientes resultantes en el acuerdo global más alto y más bajo son ilustrados en las figuras 4 y 5, respectivamente.

**DISCUSIÓN** El hallazgo clave de nuestro proyecto de consenso entre un grupo largo y diverso de especialistas cerebrovasculares multidisciplinares es que fuimos capaces de desarrollar un modelo de puntaje completo para recomendaciones en el manejo de UIA. Y más importante, este modelo tiene un alto acuerdo con la toma de decisión actual para UIA en una población de pacientes seleccionados, evidenciado por un alto acuerdo intertasador con recomendaciones derivadas de UIATS entre el grupo de especialistas. El nivel de acuerdo con las recomendaciones de manejo basadas en el modelo UIATS es independiente del trasfondo profesional subyacente, ej., intervencionista o no intervencionista, y es incluso mayor entre especialistas que no estuvieron involucrados en el desarrollo del modelo de puntaje.

La UIATS no es un estudio pronóstico ni un modelo predictivo para la ruptura de UIA, ya que se deriva de un consenso de prácticas actuales de manejo de UIA entre especialistas cerebrovasculares utilizando el método Delphi y sólo indirectamente de datos publicados. En ese sentido difiere de la recientemente publicada escala PHASES, un modelo basado en datos recolectados prospectivamente de 6 estudios de cohorte sobre el riesgo de ruptura de UIA, que aporta riesgos absolutos de la ruptura en los primeros 5 años luego de la detección del aneurisma utilizando 6 características basales recuperables (localización geográfica del paciente y edad, tamaño del aneurisma y localización, presencia de hipertensión arterial y HSA previa de un aneurisma diferente).<sup>23</sup> Sin embargo, algunos subgrupos de la escala PHASES fueron subrepresentados, como los pacientes con aneurismas familiares, o pueden haber sido subrepresentados, como los fumadores jóvenes. Por lo tanto, el puntaje puede no aplicarse a todos los pacientes. También, el puntaje es verídico sólo para los primeros 5 años luego de la detección del UIA debido a los datos de seguimiento limitados a largo plazo, y muchos pacientes tienen una expectativa de vida mayor a los 5 años. Además, varias características del aneurisma encontradas o sugeridas como factores de riesgo de ruptura en estudios de casos y controles, no pudieron ser incluidas en la escala PHASES. Finalmente, la escala PHASES fue desarrollada para predecir el riesgo de ruptura, mientras que cuando un médico recomienda reparar un UIA, el riesgo de intervención también tiene que ser tomado en cuenta, lo cual no se hace en la escala PHASES. Por lo tanto, hay muchas incertidumbres debido a los niveles de evidencia variables, que tienen que ser tomados en cuenta en la práctica clínica al consultar pacientes con UIA.

El modelo UIATS fue diseñado para encarar estas incertidumbres y por lo tanto para armonizar el alto nivel de variación entre los médicos en cuanto al manejo individual de los pacientes con UIA. La UIATS fue desarrollado parcialmente en base a datos, pero también utilizando el consenso entre especialistas en el área. El mérito de este modelo es que toma en cuenta muchos factores diferentes que frecuentemente influyen en las decisiones clínicas, pero que no fueron bien estudiadas en estudios observacionales

**Figura 4** Recomendaciones UIATS de casos resultando en el mayor acuerdo entre las cohortes de revisores internos y externos

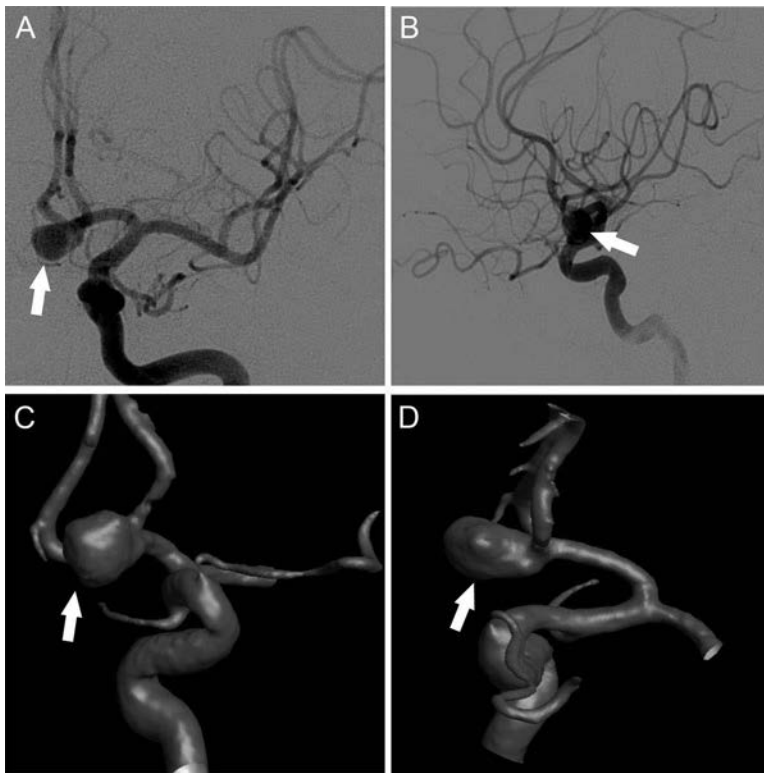

Los puntajes correspondientes en acuerdo con las características de la escala para el tratamiento del aneurisma intracranial no roto (UIATS) son dados entre paréntesis. Angiografía por cateterismo de una mujer de 47 años de edad (3 puntos favoreciendo el tratamiento por paciente de edad entre 41-60 años) que había realizado una RM de encéfalo por cefaleas crónicas con reconstrucciones en 3 dimensiones (A) posterior-anterior y (B) proyección lateral como también (C) posterior-anterior y (D) lateral. Este aneurisma incidental de la arteria comunicante anterior (flecha, 2 puntos favoreciendo el tratamiento por la localización del aneurisma), de borde irregular (3 puntos favoreciendo el tratamiento por la morfología irregular) tenía un diámetro máximo de 7,6 mm (2 puntos favoreciendo el tratamiento por el diámetro del aneurisma) con un diámetro del cuello de 3,5 mm. Las razones del aspecto y el tamaño fueron calculadas en 2,1 y 3,8, respectivamente (1 punto favoreciendo el tratamiento por aspecto o razón del tamaño mayor que 1,6 o 3,0, respectivamente). Su historia médica incluía hipertensión arterial (2 puntos favoreciendo el tratamiento por factor de riesgo de hipertensión), pero sin otras comorbilidades crónicas. El puntaje resultante en base a la UIATS fue 13 puntos a favor de la reparación del aneurisma y 7 puntos a favor del manejo conservador (1 punto por la edad de la paciente de 41-60 años, 1 punto por el tamaño del aneurisma 6-10 mm, y 5 puntos por el riesgo constante relacionado a la intervención). La recomendación UIATS resultante fue "reparación del aneurisma". El acuerdo global con esta recomendación UIATS fue 4,73 (intervalo de confianza 95% 4,62-4,85) para ambas cohortes de revisión.

previos, ej., la edad joven o la larga expectativa de vida, los factores de riesgo coexistentes modificables y no modificables, las características morfológicas del UIA, o la relevancia de síntomas clínicos relacionados con UIA.<sup>5,10,11,13,24,25</sup> Admitimos que el modelo UIATS requiere más características basales que la escala PHASES, lo que hace que su aplicación consuma más tiempo. Sin embargo, nuestros resultados resaltan que los especialistas en investigación y tratamiento de UIA cuentan con estos factores en la toma de decisión y que estos especialistas tienen un alto nivel de acuerdo sobre cómo manejar estos factores, para los cuales los datos son actualmente incompletos o faltantes. Nosotros utilizamos el método Delphi para obtener científicamente un consenso y subsecuentemente categorizar sistemáticamente los potenciales factores para la toma de decisión contemporánea en el manejo apropiado de UIA. Los estudios de otros campos médicos han utilizado el método Delphi para alcanzar sistemáticamente el consenso o desarrollar escalas de tratamiento en sujetos similares controversiales o complejos, entre especialistas profesional y/o

geográficamente dispersos.<sup>26-28</sup> Nosotros enfatizamos que los datos derivados de consensos entre especialistas no pueden reemplazar evidencia, sino complementarla, específicamente en áreas donde hay incertidumbres. Si aparecen más datos observacionales y los predictores de ruptura de aneurisma y complicaciones del tratamiento se vuelven más sofisticados, el modelo UIATS podría ser ajustado. Sin embargo, hasta que estos datos aparezcan, nuestro modelo de puntaje propuesto constituye un medio organizado y objetivo para capturar el mejor consenso posible en el manejo de UIA como complemento de los modelos predictivos de ruptura de UIA existentes.

Nuestro estudio tiene varias limitaciones. Aunque incluimos una amplia variedad de especialistas multidisciplinares predominantemente de varios países occidentales desarrollados con diferentes sistemas del cuidado de la salud, no podemos decir que esta "población" de especialistas es representativa de la "comunidad de especialistas o expertos en UIA" en general, si tal grupo puede ser definido. En segundo lugar, una premisa importante en la construcción de UIATS es que el manejo de UIA constituye una comparación entre el riesgo de ruptura *vs* los riesgos del tratamiento en ese paciente en particular. Algunos han argumentado que estas 2 "cantidades", una siendo la tasa de riesgo de evento y la otra siendo el riesgo en un momento, no pueden ser comparadas de forma válida.<sup>29</sup> Sin embargo, en la práctica diaria, esto es lo que hacen los médicos, ej., comparar el riesgo de ruptura de aneurisma con el riesgo de reparación preventiva del aneurisma. En tercer lugar, utilizamos un escenario de decisión binaria (tratar o no tratar) en lugar de hacer distinciones entre diferentes modalidades posibles de tratamiento, principalmente para proponer un modelo de puntaje que no dividiera el grupo de especialistas. En cuarto lugar, utilizamos un conjunto de datos de meta-análisis para incorporar porcentajes de riesgo de tratamiento en nuestro modelo. Sin embargo, dada la falta de datos más robustos sobre factores de riesgo para complicaciones del tratamiento de UIA, no está claro si el riesgo individual de tratamiento en un paciente con UIA puede ser distintivamente menor o mayor dependiendo de la experiencia del cirujano o el intervencionista, la modalidad del tratamiento y la complejidad del aneurisma. Por último, las series de casos que validamos con UIATS cubrieron un amplio rango de pacientes y aneurismas, pero puede no reflejar enteramente el espectro completo de pacientes y aneurismas vistos en la práctica clínica. Como ejemplo, en el set de validación de datos, 13 de los 30 UIA eran mayores a 7 mm, que puede no reflejar la distribución de tamaño de UIA en la población general. Además, la presentación de los valores de la escala a los revisores externos durante la validación puede haber introducido algún sesgo si estos expertos externos tenían alguna duda y por lo tanto tendían a estar de acuerdo con las recomendaciones propuestas. Sin embargo, dada la experiencia de los revisores externos, no sentimos que esto haya influenciado los resultados de forma importante. El proyecto del consenso multidisciplinario ha resultado en el modelo UIATS, que captura la toma de decisión contemporánea y multifactorial de especialistas en el manejo de UIA. Al aplicar este modelo de puntaje, los médicos pueden apreciar lo que individuos altamente informados en el campo cerebrovascular aconsejarían a un paciente en particular en base a los datos

**Figura 5 Recomendaciones UIATS de casos resultando en el menor acuerdo entre las cohortes de revisores internos y externos**

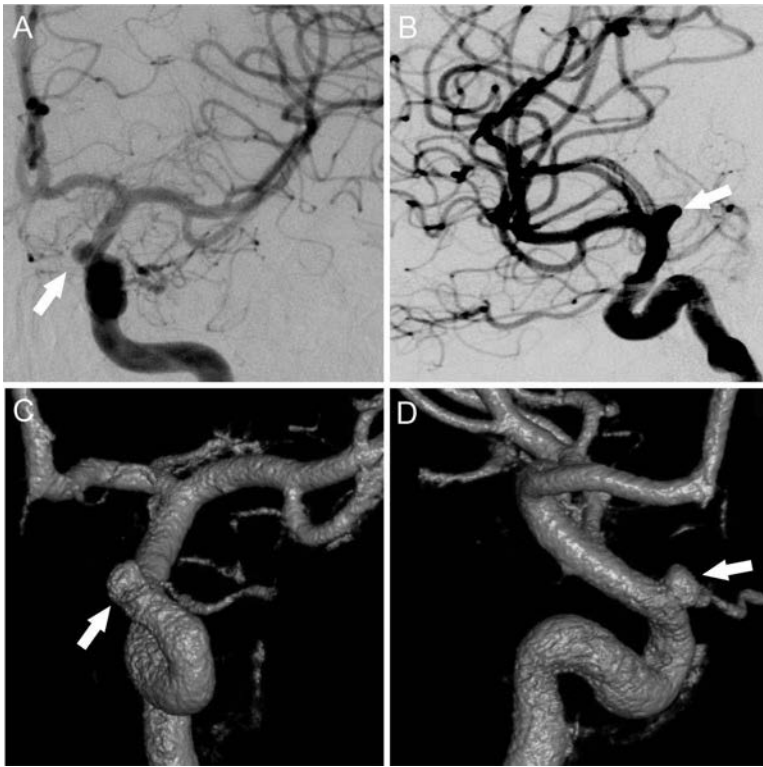

Los puntajes correspondientes en acuerdo con las características de la escala para el tratamiento del aneurisma intracranial no roto (UIATS) son dados entre paréntesis. Angiografía por cateterismo de una mujer de 25 años de edad (4 puntos favoreciendo el tratamiento por paciente de edad menor a 40 años) que había realizado una RM de encéfalo por cefaleas persistentes, vértigo y trastornos visuales bitemporales ocasionales (debido a un aura de migraña) con reconstrucciones en 3 dimensiones (A) posterior-anterior y (B) proyección lateral como también (C) posterior-anterior y (D) lateral. Este aneurisma del lado izquierdo de cuello amplio de la arteria carótida interna paraoftálmica, de diámetro máximo de 3 mm con un diámetro del cuello de 2,7 mm (3 puntos favoreciendo el manejo conservador por la complejidad del aneurisma debido al ancho de su cuello). Esta paciente no reportó ningún factor de riesgo adicional en su historia médica. Los puntajes resultantes en base a la UIATS fueron 4 puntos a favor de la reparación del aneurisma y 8 puntos (incluyendo 5 puntos favoreciendo el manejo conservador por el riesgo constante relacionado a la intervención) a favor del manejo conservador. La recomendación UIATS resultante fue "manejo conservador". El acuerdo global con esta recomendación UIATS fue 3,7 (intervalo de confianza 95% 3,44-3,96) para ambas cohortes de revisión.

disponibles y a las incertidumbres. Como la validación del modelo UIATS fue testada en base a teoría más que con datos empíricos, su aplicabilidad y precisión clínica todavía deben ser exploradas prospectivamente en pacientes con UIA. Por lo tanto, las recomendaciones de tratamiento actual pueden cambiar si aparecen nuevos datos de dichos estudios o de futuros estudios observacionales sobre UIA. Por último, los factores individuales de los pacientes más allá de aquellos tenidos en cuenta en esta escala, también pueden alterar el manejo individual de un paciente con un UIA.

#### AFILIACIONES DE LOS AUTORES

Del Department of Neurosurgery (N.E., K.B., A.A., H.-J.S., D.H.), Medical Faculty, Heinrich-Heine-University, Düsseldorf, Germany; Departments of Neurology (R.D.B., A.A.R.) y Neurologic Surgery (G.L.), Mayo Clinic, Rochester, MN; Department of Clinical Neurosciences (S.J.), University of Helsinki, Finland; Department of Radiology—Interventional Neuroradiology (J. Raymond), CHUM Research Center, Notre-Dame Hospital, Montreal, Quebec, Canada; Department of Neurological Surgery (A. Morita), Nippon Medical School, Tokyo, Japan; Departments of Epidemiology (J.C.T.) y Neurosurgery (D.M.H.), University of Iowa, Iowa City; Mallinckrodt Institute of Radiology (C.P.D.), Washington University School of Medicine/Barnes Jewish Hospital, St. Louis, MO; Department of Neurosurgery (A. Raabe), Inselspital, Bern, Switzerland; Department of Neurological Surgery (J.M.), Vanderbilt University Medical Center, Nashville, TN; Department of Neurosurgery (M.K., M.N.), Helsinki

University Central Hospital, Helsinki, Finland; Department of Neurosurgery (S.A.-H.), University of Illinois at Chicago; Centre for Clinical Brain Sciences (R.A.-S.S.), University of Edinburgh, United Kingdom; Department of Neurosurgery (D.L.B.), Emory Stroke Center, Emory University School of Medicine, Atlanta GA; Department of Neurosurgery (J.B.), The Mount Sinai Health System, New York, NY; Department of Neuroradiology (A.B.), CHU Montpellier, Montpellier, France; Department of Neurosurgery (A.S.D.), Tulane University School of Medicine, New Orleans, LA; Department of Neurosurgery (D.J.K.), Cerebrovascular Centre, Stony Brook University Medical Center, Stony Brook, NY; Department of Neurosurgery (A.G.), Medical University of Vienna, Austria; Department of Neurology (G.J.H.) and Neurosurgery Unit (N.K.), Sir Charles Gairdner Hospital, Nedlands, Western Australia, Australia; School of Medicine and Pharmacology (G.J.H.), The University of Western Australia, Perth, Australia; Department of Neurosurgery (B.L.H.), University of Florida, Gainesville; Department of Neurological Surgery (P.J., R.H.R.), Thomas Jefferson University Hospital, Philadelphia, PA; Department of Neurosurgery (H.K.), Tokyo Women's Medical University Medical Center East, Tokyo, Japan; Saskatchewan Cerebrovascular Centre (M.E.K.), Royal University Hospital, University of Saskatchewan, Saskatoon, Canada; Department of Clinical Neurosciences (P.J.K.), Cambridge University Hospitals Trust, University of Cambridge, United Kingdom; Neurosurgery/NeuroCenter (T. Koivisto), Kuopio University Hospital, University of Eastern Finland, Finland; Department of Medical Imaging and Surgery (T. Krings, V.M.P.), Toronto Western Hospital, University Health Network, Toronto, Ontario, Canada; Department of Neurological Surgery (M.T.L.), University of California, San Francisco; Divisions of Neuroradiology (T.R.M.) and Neurosurgery (J.S., R.L.M.), St. Michaels Hospital, University of Toronto, Ontario, Canada; Institute for Critical Care Medicine (S.A.M.), Icahn School of Medicine at Mount Sinai, New York, NY; Department of Neurosurgery (E.M.), Auckland City Hospital, Auckland, New Zealand; Nuffield Department of Surgical Sciences (A. Molyneux), University of Oxford, United Kingdom; Division of Neurosurgery (M.K.M.), Australian School of Advanced Medicine, Macquarie University, Sydney, Australia; Department of Neurosurgery (K.M.), National Defense Medical College, Tokyo, Japan; Department of Neurosurgery (Y.M.), JIKEI University School of Medicine, Tokyo, Japan; Department of Neurosurgery (S.N.), Institute of Health Bioscience, University of Tokushima Graduate School, Tokushima, Japan; Department of Neurosurgery (N.N.), Hokkaido University Graduate School of Medicine, Hokkaido, Japan; Endovascular and Operative Neurovascular Surgery (C.S.O.), Beth Israel Deaconess Medical Center, Harvard Medical School, Boston, MA; Department of Radiology (L.P.), University Hospital, Reims, France; Department of Neurology (Y.B.W.E.M.R.), Academic Medical Center, Amsterdam, the Netherlands; Department of Neurosurgery (J. Rinne), Division of Clinical Neurosciences, Turku University Hospital, Turku, Finland; Department of Neurosurgery (A. Ronkainen), Tampere University Hospital, Tampere, Finland; Department of Neurosurgery (K.S.), Geneva University Hospital, Switzerland; Departments of Neurosurgery (V.S.) and Neurology (H.S.), Goethe University, Frankfurt, Germany; Department of Neurological Surgery (R.A.S., E.S.C.), New York Presbyterian Hospital, Columbia University College of Physicians and Surgeons, New York, NY; Brain Center Rudolf Magnus (M.D.I.V., G.J.E.R.), Department of Neurology and Neurosurgery, University Medical Centre Utrecht, the Netherlands; Institute for Diagnostic and Interventional Radiology and Neuroradiology (I.W.), University Hospital of Essen, Germany; Swiss NeuroInstitute (I.W., D.R.), Clinic Hirslanden, Zurich, Switzerland; Department of Neurology (M.J.H.W.), Leiden University Medical Center, Leiden, the Netherlands; Department of Surgery and Neurosurgery (G.K.C.W.), Prince of Wales Hospital, The Chinese University of Hong Kong, Hong Kong, China; Division of Neurosurgery (J.H.W.), Departments of Clinical Neurosciences and Diagnostic Imaging, University of Calgary, Alberta, Canada; Departments of Neurological Surgery and Neurology (G.J.Z.), Washington University School of Medicine, St. Louis, MO; Institute of Neurosurgery (A.P.), Section of Vascular Neurosurgery, Verona University & City Hospital, Verona, Italy; Department of Neurosurgery (P.V.), Charité University Medical Centre, Berlin, Germany; Division of Neurological Surgery (C.M.), Barrow Neurological Institute, St. Josephs Hospital and Medical Center, Phoenix, AZ; and Brain and Spine Center (P.L.), Lankenau Medical Center, Wynnewood, PA.

#### CONTRIBUCIONES DE LOS AUTORES

N.E., R.D.B., K.B., S.J., J. Ra., A. Ra., A.A., E.S.C., H.S., G.L., A.P., D.R., P.V., C.M., P.L.R. y R.L.M. estuvieron involucrados en el diseño del estudio. N.E. y K.B. recolectaron, analizaron e interpretaron los datos, pero no participaron en el consenso Delphi. N.E., R.D.B., K.B., S.J., J.Ra., Ak.Mo., J.C.T., C.P.D., A.Ra., J.M., M.K., P.V., D.H., G.J.E.R. y R.L.M. hicieron el borrador. R.D.B., S.J., J.Ra., Ak.Mo., J.C.T., C.P.D., A.Ra., J.M., M.K., S.A.H., R.A.Sa., D.L.B., J.B., A.B., A.D., D.J.F., A.G., G.H., D.M.H., B.L.H., P.J., H.K., M.E.K., P.J.K., N.K., Ti.Ko., Ti.Kr., M.T.L., T.R.M., S.A.M., E.M., An.Mo., M.K.M., K.M., Y.M., S.N., Na.Na., M.N., C.S.O., V.M.P., L.P., A.A.R., Y.B.W.E.M.R., Ja.Ri., R.H.R., An.Ro., K.S., V.S., R.A.So., J.S., H.J.S., M.D.I.V., I.W., M.J.H.W., G.K.C.W., J.H.W., G.J.Z., P.V., C.M., D.H., G.J.E.R. y R.L.M. participaron en el estudio, revisaron y comentaron la versión final del manuscrito.



## FONDOS PARA EL ESTUDIO

No se reportaron fondos.

## DECLARACIÓN DE INTERESES

N. Etmnan es consejero científico para Edge Therapeutics, Inc. R. Brown, K. Besoglu, S. Juvela, J. Raymond, A. Morita y J. Torner no tienen nada para declarar relevante al manuscrito. C. Derdeyn sirve en el Scientific Advisory Board para W. L. Gore and Associates y Pulse Therapeutics. Es consultor de Penumbra Inc. (DSMB member) y Microvention (Angio Core Lab for brain aneurysm stent trial). A. Raabe, J. Mocco, M. Korja, A. Abdulazim, S. Amin-Hanjani, R. Al-Shahi Salman, D. Barrow, J. Bederson, A. Bonafe y A. Dumontno tienen nada para declarar relevante al manuscrito. D. Fiorella es consultor para Codman Neurovascular, Covidien/EV3, Sequent Medical y Siemens Medical Imaging y recibe apoyo para investigación de Penumbra Inc. y Microvention. A. Gruber, G. Hankey, D. Hasan, B. Hoh, P. Jabbour, and H. Kasuya no tienen nada para declarar relevante al manuscrito. M. Kelly tiene acciones de Blockade Medical Inc. P. Kirkpatrick, N. Knuckey, T. Koivisto, T. Krings, M. Lawton y T. Marotta no tienen nada para declarar relevante al manuscrito. S. Mayer es consultor para Edge Therapeutics Inc. y Actelion Pharmaceuticals. E. Mee no tiene nada para declarar relevante al manuscrito. V. Mendes Pereira es consultor para Covidien. A. Molyneux, M. Morgan, K. Mori, Y. Murayama, S. Nagahiro, N. Nakayama, M. Nimelä, C. Ogilvy, L. Pierot, A. Rabinstein, Y. Roos, J. Rinne, R. Rosenwasser, A. Ronkainen, K. Schaller, V. Seifert, R. Solomon, J. Spears, H.-J. Steiger, M. Vergouwen, I. Wanke, M. Wermer, G. Wong, J. Wong, G. Zipfel, E. Sander Connolly, and H. Steinmetz no tienen nada para declarar relevante al manuscrito. G. Lanzino es consultor para Covidien, Edge Therapeutics, Inc. y Codman. A. Pasqualin, D. Rufenacht, P. Vajkoczy y C. McDougall no tienen nada para declarar relevante al manuscrito. D. Hänggi es consejero científico para Edge Therapeutics, Inc. P. LeRoux es miembro del Scientific Advisory Board para Edge Therapeutics, Inc. Y consultor para Integra, Codman, Synthes, Neurologica, Brainsgate y Orsan. G. Rinkel no tiene nada para declarar relevante al manuscrito. R. Macdonald es Chief Scientific Officer de Edge Therapeutics, Inc. Y recibe apoyo de becas del Physicians Services Incorporated Foundation, Brain Aneurysm Foundation, Canadian Institutes for Health Research y la Heart and Stroke Foundation of Canada. Ir a [Neurology.org](http://Neurology.org) para declaraciones completas.

Recibido el 5 de enero del 2015. Aceptado en su formato final el 18 de abril del 2015.

## BIBLIOGRAFÍA

- Gabriel RA, Kim H, Sidney S, et al. Ten-year detection rate of brain arteriovenous malformations in a large, multiethnic, defined population. *Stroke* 2010;41:21–26.
- Vlak MH, Algra A, Brandenburg R, Rinkel GJ. Prevalence of unruptured intracranial aneurysms, with emphasis on sex, age, comorbidity, country, and time period: a systematic review and meta-analysis. *Lancet Neurol* 2011;10:626–636.
- Ishibashi T, Murayama Y, Urashima M, et al. Unruptured intracranial aneurysms: incidence of rupture and risk factors. *Stroke* 2009;40:313–316.
- Juvela S, Poussa K, Lehto H, Porras M. Natural history of unruptured intracranial aneurysms: a long-term follow-up study. *Stroke* 2013;44:2414–2421.
- Morita A, Kirino T, Hashi K, et al. The natural course of unruptured cerebral aneurysms in a Japanese cohort. *N Engl J Med* 2012;366:2474–2482.
- Nieuwkamp DJ, Setz LE, Algra A, Linn FH, de Rooij NK, Rinkel GJ. Changes in case fatality of aneurysmal subarachnoid haemorrhage over time, according to age, sex, and region: a meta-analysis. *Lancet Neurol* 2009;8:635–642.
- Sonobe M, Yamazaki T, Yonekura M, Kikuchi H. Small unruptured intracranial aneurysm verification study: SUAVE study, Japan. *Stroke* 2010;41:1969–1977.
- Wermer MJ, van der Schaaf IC, Velthuis BK, Majoie CB, Albrecht KW, Rinkel GJ. Yield of short-term follow-up CT/MR angiography for small aneurysms detected at screening. *Stroke* 2006;37:414–418.
- Wiebers DO, Whisnant JB, Huston J III, et al. Unruptured intracranial aneurysms: natural history, clinical outcome, and risks of surgical and endovascular treatment. *Lancet* 2003;362:103–110.
- Etmnan N, Dreier R, Buchholz BA, et al. Age of collagen in intracranial saccular aneurysms. *Stroke* 2014;45:1757–1763.
- Korja M, Lehto H, Juvela S. Lifelong rupture risk of intracranial aneurysms depends on risk factors: a prospective Finnish cohort study. *Stroke* 2014;45:1958–1963.
- Rahman M, Smietana J, Hauck E, et al. Size ratio correlates with intracranial aneurysm rupture status: a prospective study. *Stroke* 2010;41:916–920.
- Ujii H, Tachibana H, Hiramatsu O, et al. Effects of size and shape (aspect ratio) on the hemodynamics of saccular aneurysms: a possible index for surgical treatment of intracranial aneurysms. *Neurosurgery* 1999;45:119–129; discussion 129–130.
- Kotowski M, Naggara O, Darsaut TE, et al. Safety and occlusion rates of surgical treatment of unruptured intracranial aneurysms: a systematic review and meta-analysis of the literature from 1990 to 2011. *J Neurol Neurosurg Psychiatry* 2013;84:42–48.
- Naggara ON, Lecler A, Oppenheim C, Meder JF, Raymond J. Endovascular treatment of intracranial unruptured aneurysms: a systematic review of the literature on safety with emphasis on subgroup analyses. *Radiology* 2012;263:828–835.
- Brown RD Jr, Broderick JP. Unruptured intracranial aneurysms: epidemiology, natural history, management options, and familial screening. *Lancet Neurol* 2014;13:393–404.
- Darsaut TE, Estrade L, Jamali S, Bojanowski MW, Chagnon M, Raymond J. Uncertainty and agreement in the management of unruptured intracranial aneurysms. *J Neurosurg* 2014;120:618–623.
- Etmnan N, Besoglu K, Barrow DL, et al. Multidisciplinary consensus on assessment of unruptured intracranial aneurysms: proposal of an international research group. *Stroke* 2014;45:1523–1530.
- Broderick JP, Sauerbeck LR, Foroud T, et al. The Familial Intracranial Aneurysm (FIA) study protocol. *BMC Med Genet* 2005;6:17.
- Schoenborn CA, Adams PF. Health behaviors of adults: United States, 2005–2007. *National Center for Health Statistics. Vital Health Stat* 2010;10:80.
- The sixth report of the Joint National Committee on prevention, detection, evaluation, and treatment of high blood pressure. *Arch Intern Med* 1997;157:2413–2446.
- Dhar S, Tremmel M, Mocco J, et al. Morphology parameters for intracranial aneurysm rupture risk assessment. *Neurosurgery* 2008;63:185–196; discussion 196–187.
- Greving JP, Wermer MJ, Brown RD Jr, et al. Development of the PHASES score for prediction of risk of rupture of intracranial aneurysms: a pooled analysis of six prospective cohort studies. *Lancet Neurol* 2014;13:59–66.
- Koffijberg H, Buskens E, Algra A, Wermer MJ, Rinkel GJ. Growth rates of intracranial aneurysms: exploring constancy. *J Neurosurg* 2008;109:176–185.
- Villablanca JP, Duckwiler GR, Jahan R, et al. Natural history of asymptomatic unruptured cerebral aneurysms evaluated at CT angiography: growth and rupture incidence and correlation with epidemiologic risk factors. *Radiology* 2013;269:258–265.
- Fisher CG, DiPaola CP, Ryken TC, et al. A novel classification system for spinal instability in neoplastic disease: an evidence-based approach and expert consensus from the Spine Oncology Study Group. *Spine (Phila Pa 1976)* 2010;35:E1221–E1229.
- Hasson F, Keeney S, McKenna H. Research guidelines for the Delphi survey technique. *J Adv Nurs* 2000;32:1008–1015.
- Zafar SY, Currow DC, Cherny N, Strasser F, Fowler R, Abernethy AP. Consensus-based standards for best supportive care in clinical trials in advanced cancer. *Lancet Oncol* 2012;13:e77–e82.
- Raymond J. Incidental intracranial aneurysms: rationale for treatment. *Curr Opin Neurol* 2009;22:96–102.
